# Supplementary material
Source: ML conference proceedings conference paper supplement (https://aclanthology.org/2024.lrec-main.905)
Supplement: OptionalSupplementaryMaterial [file 2024.lrec-main.905.OptionalSupplementaryMaterial.zip]

# Leveraging Information Redundancy of Real-World Data Through Distant Supervision

## Supplementary Material

### 1 Cohort Selection

We consider patients with at least one ICD-10<sup>1</sup> diagnostic code (principal or related) of cancer defined in eTable 1 and coded between January 1st, 2017 and August 8th, 2023. Patients with multiple cancer types are excluded.

| Cancer type      | ICD-10 code                                                         |
|------------------|---------------------------------------------------------------------|
| Anus             | C21, D013                                                           |
| Biliary Duct     | C221, C23, C24, D015, D376                                          |
| Bowel            | C17, D014, D372                                                     |
| Breast           | C50, D05, D486                                                      |
| Colon            | C18, C19, D010, D011, D374, D373, C20, D012, D375                   |
| Head & Neck      | C0*, C10, C11, C12, C13, C14, C30, C31, C32, D000, D020, D370, D380 |
| Kidney           | C64, C65, D410, D411                                                |
| Lung             | C33, C34, D021, D022                                                |
| Oesophagus       | C15, D001                                                           |
| Other Gynecology | C51, C52, C57, C58, D071, D072, D073, D392, D397, D399              |
| Other Pneumology | C37, C38, C39, D023, D024, D382D383, D384, D385, D386               |
| Pancreas         | C250, C251, C252, C253, C255, C256, C257, C258, C259                |
| Prostate         | C61, D075, D400                                                     |
| Thyroid          | C73, D440                                                           |

eTable 1: ICD-10 for cohort selection

<sup>1</sup>International Classification of Diseases, Tenth Revision

## 2 Modelling & Training

To classify date spans, we add a RoBERTa token classification head that takes as input the contextual embedding at the masked position (eFigure 1). For all experiments, we use a pre-trained CamemBERT language model trained on French clinical reports. Nevertheless, it's possible to utilize a different contextual encoder.

For training, we use the AdamW optimizer with the following parameters: Transformer Encoder learning rate =  $5e-5$  (with a linear warmup of 10% of steps), RoBERTa token classification head learning rate =  $5e-4$ . Both learning rates are decreased with a linear scheduler. All rest of hyper-parameters are set to default ones.

As no recommendation exists for the application of these strategies to NLP tasks, we use 15 documents (105 entities) randomly sampled from the development set to evaluate the different hyper-parameter combinations, results are shown in eTable 2.

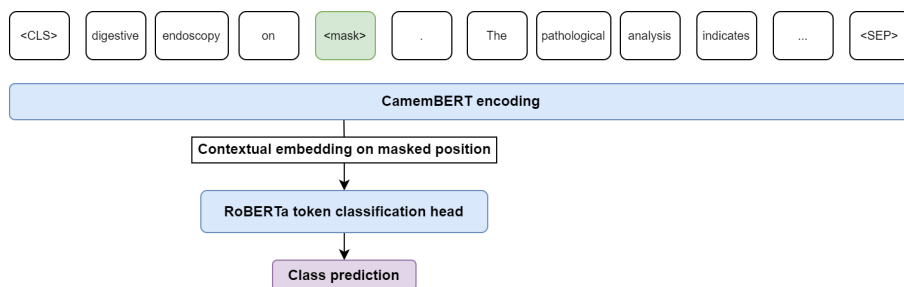

eFigure 1: Model schema

| Method  | Hyper-parameter              | Mean F1     | N experiments |
|---------|------------------------------|-------------|---------------|
| NCE RCE | $\alpha = 0.1, \beta = 1$    | <b>0.85</b> | 3             |
| NCE RCE | $\alpha = 1, \beta = 1$      | 0.80        | 3             |
| NCE RCE | $\alpha = 1, \beta = 0.1$    | 0.77        | 3             |
| NCE RCE | $\alpha = 0, 1, \beta = 10$  | 0.79        | 3             |
| O2U     | fr=30% ; NCE-RCE best        | <b>0.89</b> | 3             |
| O2U     | fr=40% ; NCE-RCE best        | 0.86        | 3             |
| O2U     | fr=50% ; NCE-RCE best        | 0.82        | 3             |
| O2U     | fr=60% ; NCE-RCE best        | 0.83        | 3             |
| O2U     | fr=70% ; NCE-RCE best        | 0.83        | 3             |
| O2U     | fr=30% ; CE                  | <b>0.89</b> | 3             |
| O2U     | fr=40% ; CE                  | 0.83        | 3             |
| O2U     | fr=50% ; CE                  | 0.83        | 3             |
| O2U     | fr=60% ; CE                  | 0.86        | 3             |
| O2U     | fr=70% ; CE                  | 0.86        | 3             |
| LRT     | $\delta = 1.3$ ; NCERCE best | <b>0.80</b> | 5             |
| LRT     | $\delta = 1.4$ ; NCERCE best | 0.79        | 5             |
| LRT     | $\delta = 1.5$ ; NCERCE best | 0.79        | 5             |

eTable 2: Mean F1-score for different hyper-parameter combinations. The forget rate hyper-parameter of the O2U method is indicated as *fr*.
